# Supplementary material for: An individual’s physique is associated with the length of the reconstruction route via the retrosternal approach
Source: PLoS One. 2023 Mar 31;18(3):e0283890. doi: 10.1371/journal.pone.0283890 (PMC10065263; doi:10.1371/journal.pone.0283890)
Supplement: S1 Data — (XLSX) [file pone.0283890.s001.xlsx]

## Sheet: PM
	Age	Sex	Height	Weight	BMI	Histology	Neoadjuvant therapy	Tumor location	pStage	Anastomotic leak	Ischemia	Preoperative length: ES (mm)			Average (cm)	Postoperative length: PM (mm)			Average (cm)	PM-ES (cm)
1	75	M	163	56.8	21.3783	scc		Lt	Ⅰ			299.7	300.6	300.4	30.0233	308.1	308	302.9	30.6333	0.61
2	62	M	169	63.5	22.2331	scc		Mt	Ⅰ			337.9	337.5	335.1	33.6833	333.7	334.8	335.8	33.4767	-0.206667
3	73	M	165	40.9	15.023	scc		Mt	Ⅳ	+		341.4	331.5	338.7	33.72	332.3	331.3	333.6	33.24	-0.48
4	63	M	158	51	20.4294	scc		Mt	Ⅰ	+		324.7	319.1	322.4	32.2067	325.1	320.6	321.5	32.24	0.0333333
5	71	F	162	62.7	23.8912	scc		Lt	Ⅲ	+		349.5	350.2	343.5	34.7733	341.2	347.1	342.4	34.3567	-0.416667
6	54	M	171	62.9	21.5109	scc		Mt	Ⅰ			338.7	342.6	337	33.9433	336.6	335.3	330.2	33.4033	-0.54
7	70	M	167	52.9	18.9681	scc		Lt	Ⅰ			343.8	338.9	344.3	34.2333	346.1	335.1	343	34.14	-0.0933333
8	70	M	167	57	20.4382	scc	CT	Ut	Ⅰ	+		337.8	332.9	333	33.4567	327.5	328.5	328.2	32.8067	-0.65
9	64	M	164	63	23.4236	scc		Ce	Ⅲ	+		328.5	323.1	328.9	32.6833	329.4	330	329.1	32.95	0.266667
10	67	M	161	63	24.3046	scc		Lt	Ⅰ			322.7	321.4	325.1	32.3067	321.7	330.2	316.5	32.28	-0.0266667
11	72	M	160	56	21.875	scc	CT	Lt	Ⅰ			333.6	326	322.2	32.7267	329.8	335.8	328.3	33.13	0.403333
12	57	M	157	75	30.4272	adenocarcinoma		Lt	Ⅲ			313.1	311.6	318.5	31.44	308	310.4	311	30.98	-0.46
13	75	M	174	58	19.1571	scc		Mt	Ⅰ			375.1	379.6	378.2	37.7633	380.4	379.6	377	37.9	0.136667
14	75	M	156	65	26.7094	carcinosarcoma		Ut	Ⅱ	+	+	298.6	295.6	299.5	29.79	296.9	303.4	294.1	29.8133	0.0233333
15	80	M	156	55	22.6003	scc		Mt	Ⅰ			280.7	278.4	283.1	28.0733	294.4	294.7	288.2	29.2433	1.17
16	58	M	190	70	19.3906	scc		Mt	Ⅰ	+		360.3	366.2	361.8	36.2767	365.4	367.5	371.9	36.8267	0.55
17	53	M	172	68	22.9854	scc		Mt	Ⅱ			335.9	333.9	337.6	33.58	347.1	337.3	340.1	34.15	0.57
18	70	M	165	62	22.7732	scc	CT	Mt	Ⅲ			359.5	354.3	347.2	35.3667	361.8	359.2	351.9	35.7633	0.396667
19	50	M	164	62.2	23.1261	scc	CT	Mt	Ⅲ			295.9	299.8	303.1	29.96	304.2	308.1	304.3	30.5533	0.593333
20	64	M	171	78	26.6749	scc		Ut	Ⅰ	+		327.1	329.6	329.4	32.87	331.9	334.2	329.2	33.1767	0.306667
21	71	F	150	43.9	19.5111	scc	CT	Mt	Ⅰ			290.8	291.4	291.6	29.1267	290.7	286.2	288.7	28.8533	-0.273333
22	67	M	168	60.3	21.3648	scc	CT	Lt	Ⅲ			353	350.3	349.7	35.1	341.3	344.3	341	34.22	-0.88
23	55	M	171	71.6	24.4862	scc		Mt	Ⅰ			346.9	346	345.2	34.6033	352	355	356.7	35.4567	0.853333
24	64	M	172	50.7	17.1376	scc	CT	Mt	Ⅲ			340.7	343	342.5	34.2067	336.2	335.5	335	33.5567	-0.65
25	78	M	165	50	18.3655	scc		Mt	Ⅰ			321.4	323.4	318.5	32.11	307.2	304.9	313.4	30.85	-1.26
26	69	M	160	50	19.5312	scc	CRT	Ut	Ⅰ			326.8	322.8	319.9	32.3167	326.5	323.3	323.4	32.44	0.123333
27	68	M	162	49.3	18.7852	scc	CRT	Lt	Ⅳ			346.1	343.6	341.3	34.3667	334.6	337.3	335.1	33.5667	-0.8
28	70	M	165	50	18.3655	scc	CT	Mt	Ⅳ			325.2	317.2	326.1	32.2833	319	318.8	315.4	31.7733	-0.51
29	78	M	163	63.5	23.9	scc	CT	Lt	Ⅲ			314.7	315.5	314.2	31.48	323.5	326.1	328.8	32.6133	1.13333
30	64	M	170	71.1	24.6021	scc	CT	Mt	Ⅲ			339.4	337.3	337.4	33.8033	323.6	329.9	334.7	32.94	-0.863333
31	72	M	165	53	19.4674	scc		Mt	Ⅲ			330.8	331.1	326.6	32.95	331.9	331	331.2	33.1367	0.186667
32	64	M	167	59	21.1553	adenocarcinoma		Lt	Ⅲ			342.6	332.1	336.9	33.72	342.7	344.9	343.9	34.3833	0.663333
33	71	M	162	45.5	17.3373	scc	CT	Mt	Ⅳ			308.9	308.3	307.1	30.81	312.2	316.7	312.8	31.39	0.58
34	69	M	163	71.3	26.8358	scc	CT	Mt	Ⅲ			343.8	339.4	338.3	34.05	333.2	335.3	335.8	33.4767	-0.573333
35	65	M	160	61	23.8281	scc		Mt	Ⅰ			300.6	307.5	306.1	30.4733	303.2	301.9	305.1	30.34	-0.133333
36	68	M	166	51	18.5078	acc	CT	Mt	Ⅰ			335.1	335.8	334.8	33.5233	337.2	331	330.8	33.3	-0.223333
37	80	M	156	69.9	28.7229	scc	CT	Mt	Ⅰ			294.7	296.3	297.6	29.62	303.6	302.8	302.4	30.2933	0.673333
38	62	M	167	58	20.7967	scc		Lt	Ⅲ			320	336.9	334.3	33.04	328.6	332.4	333.7	33.1567	0.116667
39	45	F	164	51	18.9619	scc		Mt	Ⅰ	+		324.9	329.7	325.2	32.66	336.2	336.5	339.6	33.7433	1.08333
40	74	M	164	54.4	20.2261	scc	CT	Mt	Ⅲ			345.1	346.1	342.3	34.45	347	338.3	343.7	34.3	-0.15
41	64	M	170	51	17.6471	scc		Mt	Ⅰ	+		362.4	367.1	371.9	36.7133	371.1	374.1	373.8	37.3	0.586667
42	81	F	138	34	17.8534	scc		Mt	Ⅰ			274.7	276.1	279.3	27.67	282.9	281.2	273.3	27.9133	0.243333
43	72	M	156	56.5	23.2166	scc	CT	Lt	Ⅲ			308.4	310	308.6	30.9	307.2	313.6	314.4	31.1733	0.273333
44	72	M	162	54	20.5761	scc		Mt	Ⅱ			342.3	333.4	333.4	33.6367	326.2	327.7	333.1	32.9	-0.736667
45	73	M	163	60	22.5827	scc		Mt	Ⅰ			323.6	329.7	326.2	32.65	328.7	323.7	322.7	32.5033	-0.146667
46	74	M	169	65	22.7583	scc		Lt	Ⅰ			320.5	327.7	324.9	32.4367	329.5	321	325	32.5167	0.08
47	67	M	173	64.9	21.6847	scc	CT	Mt	Ⅰ			337.6	339.5	335.2	33.7433	329.7	326.8	333.7	33.0067	-0.736667
48	75	M	167	49.7	17.8206	scc		Mt	Ⅱ			357.2	358.6	360.3	35.87	359.1	360.7	357.4	35.9067	0.0366667
49	66	M	163	58	21.83	scc		Mt	Ⅳ			330.5	329.4	326.8	32.89	335.8	334.9	334	33.49	0.6
50	66	M	172	68	22.9854	scc		Mt	Ⅲ			347.6	341.6	343.8	34.4333	333.4	335.2	333.6	33.4067	-1.02667
